# Supplementary material
Source: PubMed Central journal article supplement (PMC1904170)

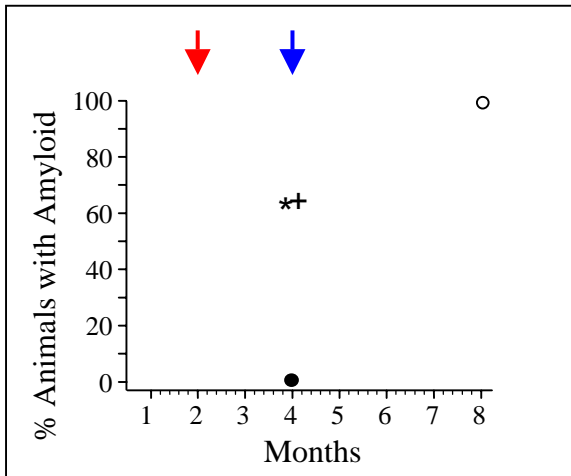

Supplement: pnas_0700848104_1.pdf [file pnas_0700848104_1.pdf]
